# Supplementary material for: Different Types of Mastoid Process Vibrations Affect Dynamic Margin of Stability Differently
Source: Front Hum Neurosci. 2022 Jun 27;16:896221. doi: 10.3389/fnhum.2022.896221 (PMC9271872; doi:10.3389/fnhum.2022.896221)
Supplement: Supplementary file 1 [file Data_Sheet_1.xlsx]

## Sheet: Average_MOS
	MOSRap-dominant									MOSLap-nondominant										MOSap_Mean								MOSml-dominant					MOSml-nondominant							MOSml_mean
	Bi	No	Uni							Bi	No	Uni								Bi	No	Uni						Bi	No	Uni			Bi	No	Uni					Bi	No	Uni
sub01	-174.416	-176.09	-178.473							-176.714	-168.685	-177.436								-175.565	-172.388	-177.955						25.1581	21.4917	26.5308			22.2396	20.4379	22.8978					23.6988	20.9648	24.7143
sub02	-153.561	-147.296	-155.186							-155.439	-152.605	-159.86								-154.5	-149.951	-157.523						45.1243	34.398	41.0873			28.2599	28.4231	29.7118					36.6921	31.4105	35.3996
sub03	-172.107	-168.602	-174.63							-169.384	-169.011	-172.256								-170.746	-168.806	-173.443						16.5108	16.1861	18.006			15.5246	12.8736	15.5503					16.0177	14.5298	16.7782
sub04	-177.875	-171.194	-181.181							-171.393	-170.991	-177.66								-174.634	-171.093	-179.421						2.62052	3.22785	12.5551			0.235625	6.62402	-1.02433					1.42807	4.92593	5.76537
sub05	-140.172	-138.188	-144.096							-126.813	-121.428	-134.479								-133.493	-129.808	-139.288						25.3186	24.6378	25.6207			21.3496	20.0667	21.9221					23.3341	22.3522	23.7714
sub06	-157.885	-153.162	-165.171							-160.549	-162.769	-173.121								-159.217	-157.966	-169.146						32.1631	28.2854	35.7867			29.5779	29.4967	33.1352					30.8705	28.8911	34.4609
sub07	-148.496	-142.076	-147.099							-151.889	-139.028	-156.039								-150.193	-140.552	-151.569						16.6692	9.26393	17.4588			7.3318	4.67975	7.53561					12.0005	6.97184	12.4972
sub08	-183.97	-170.035	-187.765							-180.393	-170.225	-184.964								-182.182	-170.13	-186.364						30.7454	29.7564	31.3616			26.1832	24.4232	27.4867					28.4643	27.0898	29.4242
sub09	-169.367	-166.128	-171.874							-152.22	-155.007	-158.907								-160.794	-160.567	-165.391						43.4615	38.5569	44.1753			38.9804	35.7568	40.4189					41.221	37.1568	42.2971
sub10	-183.318	-179.359	-188.314							-171.882	-174.288	-188.931								-177.6	-176.823	-188.622						11.3088	8.01403	15.3617			8.75373	4.40866	12.3318					10.0313	6.21134	13.8467
sub11	-147.648	-144.099	-159.164							-151.151	-144.158	-152.214								-149.399	-144.128	-155.689						20.6446	1.74588	21.6925			1.85649	1.04225	-0.64775					11.2505	1.39406	10.5224
sub12	-208.168	-204.063	-211.691							-195.381	-188.617	-196.141								-201.775	-196.34	-203.916						14.0333	13.2136	14.8572			5.09138	9.10544	6.21052					9.56235	11.1595	10.5339
sub13	-159.022	-154.614	-163.169							-146.406	-140.052	-153.311								-152.714	-147.333	-158.24						15.4207	13.7349	18.5509			9.1473	8.59311	9.17744					12.284	11.164	13.8642
sub14	-151.179	-148.871	-167.402							-155.63	-154.752	-163.813								-153.404	-151.812	-165.608						16.1569	15.1441	17.3161			5.20405	5.21815	5.80867					10.6805	10.1811	11.5624
sub15	-142.454	-132.554	-148.358							-155.526	-147.472	-159.927								-148.99	-140.013	-154.142						24.3538	22.6079	26.7852			9.28678	17.2493	9.98853					16.8203	19.9286	18.3869
sub16	-138.351	-131.658	-140.591							-148.351	-144.658	-150.591								-143.351	-138.158	-145.591						8.23094	6.60434	8.78198			6.02309	5.60434	6.78198					7.12702	6.10434	7.78198
sub17	-188.88	-189.284	-205.066							-183.687	-196.545	-204.742								-186.284	-192.915	-204.904						21.8209	19.4472	22.0662			8.92077	8.72129	11.4627					15.3708	14.0842	16.7645
sub18	-122.685	-120.788	-123.868							-112.97	-116.457	-113.879								-117.827	-118.622	-118.874						2.24218	1.51336	3.91552			1.53941	1.33785	2.74205					1.89079	1.4256	3.32878
sub19	-131.653	-128.693	-140.858							-117.626	-118.451	-124.068								-124.639	-123.572	-132.463						20.7719	20.7977	22.4269			14.2986	13.6772	15.9465					17.5353	17.2374	19.1867
sub20	-123.954	-124.471	-127.491							-110.285	-110.711	-103.453								-117.12	-117.591	-115.472						26.1358	25.7756	26.8043			12.5788	11.139	12.2725					19.3573	18.4573	19.5384
avg	-159.758	-154.561	-164.072							-154.685	-152.225	-160.29								-156.721	-153.428	-162.181					avg	20.9446	18.5101	22.557			13.6192	12.9439	14.8945					17.2819	15.582	18.5212
sd	23.031	22.8567	23.9127							23.4719	23.7186	26.3552								22.8266	22.7905	24.6991					sd	11.3997	10.0747	10.1669			10.7557	10.0829	11.2768					10.7202	10.1797	10.4164

## Sheet: STD_MOS
	MOSapVariability
	MOSapVariability-dominant					MOSap-nondominant					MOSapVariability-mean					MOSmlVariability-Dominant					MOSmlVariability-nonDominant					MOSmlVariability-mean
	Bi	No	Uni			Bi	No	Uni			Bi	No	Uni			Bi	No	Uni			Bi	No	Uni			Bi	No	Uni
sub01	19.7354	18.951	21.3806			19.7081	18.737	24.4304			19.7217	18.844	22.9055			9.59532	7.41383	8.6766			8.18996	8.8411	4.13			8.89264	8.12746	6.4033
sub02	24.5531	23.1095	22.3651			21.9394	21.8423	22.1201			23.2463	22.4759	22.2426			8.08506	7.15849	10.0957			6.92499	6.44991	7.5366			7.50502	6.8042	8.81613
sub03	20.9877	22.2686	21.4031			21.5871	20.5077	23.0934			21.2874	21.3881	22.2483			8.3442	8.27534	8.40053			8.44528	7.87073	9.17555			8.39474	8.07304	8.78804
sub04	21.9719	28.4792	28.2568			23.124	21.754	25.3969			22.5479	25.1166	26.8268			6.08816	5.90302	6.76388			7.75322	7.74225	8.49483			6.92069	6.82264	7.62936
sub05	25.3591	30.2562	37.2477			28.6249	27.9206	31.148			26.992	29.0884	34.1978			5.30867	4.65856	6.85501			6.44925	5.60773	6.83132			5.87896	5.13314	6.84316
sub06	24.7738	21.4768	27.4042			26.2632	23.556	28.0817			25.5185	22.5164	27.7429			6.37095	5.89517	7.0681			7.2475	6.37806	9.32828			6.80923	6.13661	8.19819
sub07	23.1864	23.1644	24.0056			21.3154	20.3729	21.6507			22.2509	21.7687	22.8281			7.0825	6.33788	7.14832			8.01187	7.11163	8.39283			7.54718	6.72475	7.77058
sub08	25.3117	23.236	26.2666			21.734	21.6229	23.4783			23.5229	22.4294	24.8725			6.68291	5.08956	6.7274			6.83687	6.28775	8.62339			6.75989	5.68865	7.6754
sub09	19.1108	19.1049	23.3161			19.6454	19.4237	19.8695			19.3781	19.2643	21.5928			5.99305	5.47263	6.21526			8.92412	8.28004	10.4199			7.45859	6.87634	8.31758
sub10	21.6826	21.0422	21.9487			26.7684	25.1184	27.3172			24.2255	23.0803	24.633			4.56285	4.24654	9.32458			6.07295	5.69425	6.62047			5.3179	4.9704	7.97253
sub11	35.7885	32.4364	39.8653			29.892	29.3281	33.6922			32.8402	30.8823	36.7787			6.66487	6.41519	7.30554			5.43564	4.4443	6.25089			6.05026	5.42975	6.77822
sub12	17.1962	16.4378	19.3369			21.552	21.2816	21.6704			19.3741	18.8597	20.5036			5.58077	5.3939	6.02745			5.30578	5.24604	6.34195			5.44328	5.31997	6.1847
sub13	22.8427	22.1454	24.4004			24.1022	19.6038	24.4498			23.4724	20.8746	24.4251			6.35776	5.88217	9.35396			5.99404	5.72131	6.57395			6.1759	5.80174	7.96396
sub14	20.8776	19.8211	21.7816			20.1157	17.8051	22.3451			20.4966	18.8131	22.0634			8.0158	7.50849	8.81811			7.84467	7.81112	8.61851			7.93023	7.65981	8.71831
sub15	26.5302	24.11	28.4365			21.7634	21.5005	29.3699			24.1468	22.8052	28.9032			6.46584	6.10778	6.26425			5.55047	5.46555	5.60211			6.00815	5.78667	5.93318
sub16	29.4505	29.031	32.8529			37.8529	31.031	39.4505			33.6517	30.031	36.1517			5.56809	5.16158	5.75353			2.94505	2.9031	3.28529			4.25657	4.03234	4.51941
sub17	24.6342	22.6276	25.3094			22.9678	21.0035	23.4939			23.801	21.8156	24.4016			12.0857	11.3438	13.2128			7.19361	7.00682	8.92392			9.63967	9.1753	11.0683
sub18	20.3365	19.3354	20.8594			21.9992	20.1868	24.7583			21.1679	19.7611	22.8088			4.54553	2.39346	4.67087			4.90767	4.76024	5.32811			4.7266	3.57685	4.99949
sub19	17.8649	16.9966	20.438			20.0164	20.1011	21.898			18.9407	18.5488	21.168			6.01765	5.44625	6.1875			6.6487	5.90686	6.85173			6.33318	5.67655	6.51961
sub20	19.9299	15.6713	20.3193			21.98	16.3926	27.5647			20.955	16.032	23.942			7.33223	5.39328	8.65419			7.78631	7.1831	8.81501			7.55927	6.28819	8.7346
avg	23.1062	22.4851	25.3597			23.6476	21.9545	25.764			23.3769	22.2198	25.5618		avg	6.8374	6.07484	7.67617			6.7234	6.3356	7.30723			6.7804	6.20522	7.4917
sd	4.29376	4.58595	5.66024			4.4128	3.75736	4.77762			4.00485	3.95107	4.88637		sd	1.76532	1.78153	1.93049			1.43762	1.44452	1.8472			1.37243	1.37966	1.50934

## Sheet: Symmetric Index
	MOSap				MOSml				MOSap variability				MOSml variability
	Bi	No	Uni		Bi	No	Uni		Bi	No	Uni		Bi	No	Uni
sub01	-1.30896	4.29525	0.582718		12.31	5.03	14.7		0.138371	1.13558	-13.3144		15.8036	-17.5611	71.0041
sub02	-1.21535	-3.5406	-2.96694		45.96	19.02	32.13		11.2435	5.63826	1.1013		15.4573	10.4139	29.0269
sub03	1.59488	-0.242063	1.3686		6.16	22.8	14.64		-2.81555	8.23312	-7.59744		-1.20404	5.01185	-8.81908
sub04	3.71213	0.118948	1.96278		167	68.94	235.53		-5.10977	26.7756	10.6605		-24.0592	-26.9578	-22.688
sub05	10.0072	12.9118	6.90448		17.01	15.56	20.45		-12.0993	8.02949	17.8365		-19.401	-18.4911	0.346178
sub06	-1.673	-6.08155	-4.70013		8.37	4.19	7.69		-5.83666	-9.23426	-2.44234		-12.8729	-7.86887	-27.5693
sub07	-2.25946	2.16877	-5.89839		77.81	65.75	79.4		8.40859	12.8236	10.3158		-12.3141	-11.506	-16.0157
sub08	1.96394	-0.11199	1.50297		16.03	19.69	13.17		15.2095	7.1917	11.2106		-2.27749	-21.0628	-24.7022
sub09	10.6639	6.92605	7.83996		10.87	7.54	8.88		-2.75895	-1.65503	15.9616		-39.2979	-40.8271	-50.5513
sub10	6.43942	2.86779	-0.327174		25.47	21.88	58.04		-20.9938	-17.6609	-21.7938		-28.3966	-29.1268	33.9179
sub11	-2.3449	-0.0405509	4.46449		67	50.47	212.31		17.955	10.0651	16.7845		20.3169	36.298	15.5595
sub12	6.33757	7.8671	7.62589		93.51	36.81	82.08		-22.4827	-25.6835	-11.3808		5.05202	2.77937	-5.08516
sub13	8.26129	9.88364	6.2296		51.07	46.06	67.61		-5.3659	12.1754	-0.202394		5.88937	2.77256	34.9073
sub14	-2.90203	-3.87372	2.16712		102.55	97.49	99.52		3.71683	10.7161	-2.554		2.15788	-3.95095	2.28953
sub15	-8.77357	-10.6547	-7.50479		26.89	89.58	91.35		19.741	11.4425	-3.22936		15.2354	11.0985	11.1601
sub16	-6.97587	-9.40953	-6.86856		30.98	16.38	25.7		-24.9689	-6.65979	-18.2496		61.6233	56.0091	54.6141
sub17	2.78765	-3.7639	0.158107		83.93	76.16	63.25		7.00113	7.44491	7.43975		50.75	47.2677	38.7487
sub18	8.24455	3.65165	8.40342		37.17	12.31	35.25		-7.85468	-4.30848	-17.0939		-7.66161	-66.1695	-13.1461
sub19	11.2542	8.2884	12.6753		36.92	41.31	33.78		-11.3595	-16.7369	-6.89758		-9.96409	-8.11421	-10.1882
sub20	11.6706	11.7019	20.8173		70.04	79.3	74.38		-9.78303	-4.49926	-30.2624		-6.00691	-28.4632	-1.84115
avg	2.77421	1.64814	2.72184		49.3525	39.8135	63.493		-2.40074	1.76166	-2.18539		1.44149	-5.42243	5.5484
sd	6.15268	6.69297	6.97681		40.8142	30.1148	62.3751		12.9678	12.5864	13.7888		24.4453	29.1756	30.4131

## Sheet: Walking Speed
	m/s
sub01	1.24
sub02	1.14
sub03	1.43
sub04	1.65
sub05	1.25
sub06	1.29
sub07	1.79
sub08	1.43
sub09	1.79
sub10	1.29
sub11	1.34
sub12	1.21
sub13	1.25
sub14	1.38
sub15	1.38
sub16	1.79
sub17	1.34
sub18	1.43
sub19	1.34
sub20	1.25
